# Supplementary material for: New and Efficient Bioactive Glass Compositions for Controlling Endodontic Pathogens
Source: MDPI journal article supplement (doi:10.3390/nano12091577), 2022-05-06
Supplement: s1 [file s1]

## SUPPORTING INFORMATION

# New and Efficient Bioactive Glass Compositions for Controlling Endodontic Pathogens

**Bruna L. Correia <sup>1</sup>, Ana T.P.C. Gomes <sup>2</sup>, Rita Noites <sup>2</sup>, José M.F. Ferreira <sup>1</sup> and Ana S. Duarte <sup>2,\*</sup>**

<sup>1</sup> Department of Materials and Ceramic Engineering, CICECO-Aveiro Institute of Materials, Campus Santiago, University of Aveiro, 3810-193 Aveiro, Portugal; brunacorreia@ua.pt (B.L.C.); jmf@ua.pt (J.M.F.F.)

<sup>2</sup> Universidade Católica Portuguesa, Faculdade de Medicina Dentária, Centro de Investigação Interdisciplinar em Saúde, 3504-505 Viseu, Portugal; apgomes@ucp.pt (A.T.P.C.G.); rita.noites@ucp.pt (R.N.)

\* Correspondence: asduarte@ucp.pt; Tel.: +351-232-419-500

**Table S1.** Tukey's multiple comparisons test between incubation times with *Candida albicans*.

| Samples and Concentrations (mg mL <sup>-1</sup> ) |     | Time         | Mean difference | 95 % CI of difference |             | Std. Error of difference | Sig.             |
|---------------------------------------------------|-----|--------------|-----------------|-----------------------|-------------|--------------------------|------------------|
|                                                   |     |              |                 | Lower Bound           | Upper Bound |                          |                  |
| BG1                                               | 5.0 | 0 h vs 24 h  | 0.08            | -0.97                 | 1.13        | 0.32                     | ns               |
|                                                   |     | 0 h vs 48 h  | -0.24           | -1.30                 | 0.81        |                          | ns               |
|                                                   |     | 24 h vs 48 h | -0.32           | -1.38                 | 0.73        |                          | ns               |
|                                                   | 15  | 0 h vs 24 h  | 3.45            | 2.40                  | 4.51        |                          | <0.0001          |
|                                                   |     | 0 h vs 48 h  | 3.85            | 2.80                  | 4.91        |                          | <0.0001          |
|                                                   |     | 24 h vs 48 h | 0.40            | -0.65                 | 1.45        |                          | ns               |
|                                                   | Ct  | 0 h vs 24 h  | -1.91           | -2.96                 | -0.86       |                          | <0.0001          |
|                                                   |     | 0 h vs 48 h  | -4.92           | -5.97                 | -3.87       |                          | <0.0001          |
|                                                   |     | 24 h vs 48 h | -3.01           | -4.06                 | -1.96       |                          | <0.0001          |
| BG2                                               | 5.0 | 0 h vs 24 h  | 0.63            | 0.08                  | 1.18        | 0.22                     | <i>p</i> =0.0230 |
|                                                   |     | 0 h vs 48 h  | 0.30            | -0.25                 | 0.85        |                          | ns               |
|                                                   |     | 24 h vs 48 h | -0.33           | -0.88                 | 0.23        |                          | ns               |
|                                                   | 15  | 0 h vs 24 h  | 3.25            | 2.70                  | 3.80        |                          | <0.0001          |
|                                                   |     | 0 h vs 48 h  | 3.97            | 3.42                  | 4.52        |                          | <0.0001          |
|                                                   |     | 24 h vs 48 h | 0.72            | 0.17                  | 1.27        |                          | <i>p</i> =0.0082 |
|                                                   | Ct  | 0 h vs 24 h  | -2.13           | -2.68                 | -1.58       |                          | <0.0001          |
|                                                   |     | 0 h vs 48 h  | -4.92           | -5.47                 | -4.37       |                          | <0.0001          |
|                                                   |     | 24 h vs 48 h | -2.79           | -3.34                 | -2.24       |                          | <0.0001          |
| BG3                                               | 5.0 | 0 h vs 24 h  | 0.31            | -0.32                 | 0.94        | 0.26                     | ns               |
|                                                   |     | 0 h vs 48 h  | 0.16            | -0.47                 | 0.79        |                          | ns               |
|                                                   |     | 24 h vs 48 h | -0.16           | -0.79                 | 0.48        |                          | ns               |
|                                                   | 15  | 0 h vs 24 h  | 4.04            | 3.41                  | 4.67        |                          | <0.0001          |
|                                                   |     | 0 h vs 48 h  | 3.68            | 3.05                  | 4.31        |                          | <0.0001          |
|                                                   |     | 24 h vs 48 h | -0.36           | -0.99                 | 0.27        |                          | ns               |
|                                                   | Ct  | 0 h vs 24 h  | -2.13           | -2.76                 | -1.50       |                          | <0.0001          |
|                                                   |     | 0 h vs 48 h  | -4.92           | -5.55                 | -4.29       |                          | <0.0001          |
|                                                   |     | 24 h vs 48 h | -2.79           | -3.42                 | -2.16       |                          | ns               |

**Table S2.** Tukey's multiple comparisons test between incubation times with *Enterococcus faecalis*.

| Samples and Concentrations (mg mL <sup>-1</sup> ) |     | Time         | Mean difference | 95 % CI of difference |             | Std. Error of difference | Sig.     |
|---------------------------------------------------|-----|--------------|-----------------|-----------------------|-------------|--------------------------|----------|
|                                                   |     |              |                 | Lower Bound           | Upper Bound |                          |          |
| BG1                                               | 5.0 | 0 h vs 24 h  | -4.58           | -6.12                 | -3.05       | 0.62                     | <0.0001  |
|                                                   |     | 0 h vs 48 h  | -3.42           | -4.95                 | -1.89       |                          | <0.0001  |
|                                                   |     | 24 h vs 48 h | 1.16            | -0.37                 | 2.70        |                          | ns       |
|                                                   | 15  | 0 h vs 24 h  | 1.41            | -0.12                 | 2.95        |                          | ns       |
|                                                   |     | 0 h vs 48 h  | -0.39           | -1.93                 | 1.14        |                          | ns       |
|                                                   |     | 24 h vs 48 h | -1.81           | -3.34                 | -0.27       |                          | p=0.0183 |
|                                                   | Ct  | 0 h vs 24 h  | -4.81           | -6.34                 | -3.27       |                          | <0.0001  |
|                                                   |     | 0 h vs 48 h  | -6.16           | -7.70                 | -4.63       |                          | <0.0001  |
|                                                   |     | 24 h vs 48 h | -1.36           | -2.89                 | 0.18        |                          | ns       |
| BG2                                               | 5.0 | 0 h vs 24 h  | -5.70           | -6.72                 | -4.68       | 0.41                     | <0.0001  |
|                                                   |     | 0 h vs 48 h  | -5.06           | -6.08                 | -4.05       |                          | <0.0001  |
|                                                   |     | 24 h vs 48 h | 0.64            | -0.38                 | 1.66        |                          | ns       |
|                                                   | 15  | 0 h vs 24 h  | 1.33            | 0.31                  | 2.35        |                          | p=0.0085 |
|                                                   |     | 0 h vs 48 h  | 2.45            | 1.44                  | 3.48        |                          | <0.0001  |
|                                                   |     | 24 h vs 48 h | 1.13            | 0.11                  | 2.15        |                          | p=0.0271 |
|                                                   | Ct  | 0 h vs 24 h  | -4.81           | -5.83                 | -3.79       |                          | <0.0001  |
|                                                   |     | 0 h vs 48 h  | -6.16           | -7.18                 | -5.15       |                          | <0.0001  |
|                                                   |     | 24 h vs 48 h | -1.36           | -2.37                 | -0.34       |                          | p=0.0071 |
| BG3                                               | 5.0 | 0 h vs 24 h  | -4.76           | -5.86                 | -3.65       | 0.45                     | <0.0001  |
|                                                   |     | 0 h vs 48 h  | -3.59           | -4.70                 | -2.48       |                          | <0.0001  |
|                                                   |     | 24 h vs 48 h | 1.17            | 0.06                  | 2.28        |                          | p=0.0371 |
|                                                   | 15  | 0 h vs 24 h  | -0.87           | -1.97                 | 0.24        |                          | ns       |
|                                                   |     | 0 h vs 48 h  | 1.36            | 0.25                  | 2.47        |                          | p=0.0134 |
|                                                   |     | 24 h vs 48 h | 2.23            | 1.12                  | 3.34        |                          | <0.0001  |
|                                                   | Ct  | 0 h vs 24 h  | -4.81           | -5.92                 | -3.70       |                          | <0.0001  |
|                                                   |     | 0 h vs 48 h  | -6.16           | -7.27                 | -5.06       |                          | <0.0001  |
|                                                   |     | 24 h vs 48 h | -1.36           | -2.46                 | -0.25       |                          | p=0.0139 |

**Table S3.** Tukey's multiple comparisons test between BGs with *Candida albicans*.

| Time | Samples and Concentrations<br>(mg mL <sup>-1</sup> ) |            | Mean difference | 95 % CI of difference |             | Std. Error of difference | Sig.     |
|------|------------------------------------------------------|------------|-----------------|-----------------------|-------------|--------------------------|----------|
|      |                                                      |            |                 | Lower Bound           | Upper Bound |                          |          |
| 0 h  | 5.0                                                  | Ct vs BG1  | 0.27            | -0.69                 | 1.23        | 0.36                     | ns       |
|      |                                                      | Ct vs BG2  | 0.04            | -0.92                 | 1.00        |                          | ns       |
|      |                                                      | Ct vs BG3  | 0.20            | -0.77                 | 1.16        |                          | ns       |
|      |                                                      | BG1 vs BG2 | -0.23           | -1.19                 | 0.73        |                          | ns       |
|      |                                                      | BG1 vs BG3 | -0.08           | -1.04                 | 0.89        |                          | ns       |
|      |                                                      | BG2 vs BG3 | 0.16            | -0.80                 | 1.12        |                          | ns       |
| 24 h |                                                      | Ct vs BG1  | 2.26            | 1.30                  | 3.22        | 0.36                     | <0.0001  |
|      |                                                      | Ct vs BG2  | 2.58            | 1.62                  | 3.54        |                          | <0.0001  |
|      |                                                      | Ct vs BG3  | 2.42            | 1.46                  | 3.38        |                          | <0.0001  |
|      |                                                      | BG1 vs BG2 | 0.32            | -0.65                 | 1.28        |                          | ns       |
|      |                                                      | BG1 vs BG3 | 0.16            | -0.80                 | 1.12        |                          | ns       |
|      |                                                      | BG2 vs BG3 | -0.16           | -1.12                 | 0.80        |                          | ns       |
| 48 h |                                                      | Ct vs BG1  | 4.95            | 3.99                  | 5.91        | 0.36                     | <0.0001  |
|      |                                                      | Ct vs BG2  | 5.26            | 4.30                  | 6.22        |                          | <0.0001  |
|      |                                                      | Ct vs BG3  | 5.27            | 4.31                  | 6.23        |                          | <0.0001  |
|      |                                                      | BG1 vs BG2 | 0.31            | -0.65                 | 1.27        |                          | ns       |
|      |                                                      | BG1 vs BG3 | 0.33            | -0.63                 | 1.29        |                          | ns       |
|      |                                                      | BG2 vs BG3 | 0.01            | -0.95                 | 0.97        |                          | ns       |
| 0 h  | 15                                                   | Ct vs BG1  | 0.21            | -0.50                 | 0.92        | 0.27                     | ns       |
|      |                                                      | Ct vs BG2  | 0.20            | -0.51                 | 0.91        |                          | ns       |
|      |                                                      | Ct vs BG3  | 0.26            | -0.45                 | 0.97        |                          | ns       |
|      |                                                      | BG1 vs BG2 | -0.01           | -0.72                 | 0.70        |                          | ns       |
|      |                                                      | BG1 vs BG3 | 0.05            | -0.66                 | 0.76        |                          | ns       |
|      |                                                      | BG2 vs BG3 | 0.06            | -0.65                 | 0.77        |                          | ns       |
| 24 h |                                                      | Ct vs BG1  | 5.58            | 4.87                  | 6.28        | 0.27                     | <0.0001  |
|      |                                                      | Ct vs BG2  | 5.36            | 4.65                  | 6.07        |                          | <0.0001  |
|      |                                                      | Ct vs BG3  | 6.21            | 5.50                  | 6.92        |                          | <0.0001  |
|      |                                                      | BG1 vs BG2 | -0.22           | -0.93                 | 0.49        |                          | ns       |
|      |                                                      | BG1 vs BG3 | 0.63            | -0.07                 | 1.34        |                          | ns       |
|      |                                                      | BG2 vs BG3 | 0.85            | 0.15                  | 1.56        |                          | p=0.0332 |
| 48 h |                                                      | Ct vs BG1  | 8.99            | 8.28                  | 9.70        | 0.27                     | <0.0001  |
|      |                                                      | Ct vs BG2  | 9.09            | 8.38                  | 9.80        |                          | <0.0001  |
|      |                                                      | Ct vs BG3  | 8.86            | 8.15                  | 9.57        |                          | <0.0001  |
|      |                                                      | BG1 vs BG2 | 0.10            | -0.61                 | 0.81        |                          | ns       |
|      |                                                      | BG1 vs BG3 | -0.13           | -0.84                 | 0.58        |                          | ns       |
|      |                                                      | BG2 vs BG3 | -0.23           | -0.94                 | 0.48        |                          | ns       |

**Table S4.** Tukey's multiple comparisons test between BGs with *Enterococcus faecalis*.

| Time | Samples and Concentrations<br>(mg mL <sup>-1</sup> ) |            | Mean difference | 95 % CI of difference |             | Std. Error of difference | Sig.     |
|------|------------------------------------------------------|------------|-----------------|-----------------------|-------------|--------------------------|----------|
|      |                                                      |            |                 | Lower Bound           | Upper Bound |                          |          |
| 0 h  | 5.0                                                  | Ct vs BG1  | 0.003           | -1.26                 | 1.26        | 0.47                     | ns       |
|      |                                                      | Ct vs BG2  | 0.02            | -1.24                 | 1.28        |                          | ns       |
|      |                                                      | Ct vs BG3  | 0.04            | -1.22                 | 1.30        |                          | ns       |
|      |                                                      | BG1 vs BG2 | 0.01            | -1.25                 | 1.27        |                          | ns       |
|      |                                                      | BG1 vs BG3 | 0.03            | -1.23                 | 1.30        |                          | ns       |
|      |                                                      | BG2 vs BG3 | 0.02            | -1.24                 | 1.28        |                          | ns       |
| 24 h |                                                      | Ct vs BG1  | 0.23            | -1.03                 | 1.49        | 0.47                     | ns       |
|      |                                                      | Ct vs BG2  | -0.88           | -2.14                 | 0.38        |                          | ns       |
|      |                                                      | Ct vs BG3  | 0.09            | -1.17                 | 1.35        |                          | ns       |
|      |                                                      | BG1 vs BG2 | -1.11           | -2.37                 | 0.15        |                          | ns       |
|      |                                                      | BG1 vs BG3 | -0.14           | -1.40                 | 1.12        |                          | ns       |
|      |                                                      | BG2 vs BG3 | 0.97            | -0.29                 | 2.23        |                          | ns       |
| 48 h |                                                      | Ct vs BG1  | 2.75            | 1.49                  | 4.01        | 0.47                     | <0.0001  |
|      |                                                      | Ct vs BG2  | 1.12            | -0.14                 | 2.38        |                          | ns       |
|      |                                                      | Ct vs BG3  | 2.61            | 1.35                  | 3.87        |                          | <0.0001  |
|      |                                                      | BG1 vs BG2 | -1.63           | -2.89                 | -0.37       |                          | p=0.0021 |
|      |                                                      | BG1 vs BG3 | -0.13           | -1.39                 | 1.13        |                          | ns       |
|      |                                                      | BG2 vs BG3 | 1.50            | 0.24                  | 2.76        |                          | p=0.0332 |
| 0 h  | 15                                                   | Ct vs BG1  | 0.002           | -1.27                 | 1.27        | 0.48                     | ns       |
|      |                                                      | Ct vs BG2  | 0.02            | -1.25                 | 1.29        |                          | ns       |
|      |                                                      | Ct vs BG3  | 0.03            | -1.24                 | 1.30        |                          | ns       |
|      |                                                      | BG1 vs BG2 | 0.02            | -1.25                 | 1.29        |                          | ns       |
|      |                                                      | BG1 vs BG3 | 0.03            | -1.24                 | 1.30        |                          | ns       |
|      |                                                      | BG2 vs BG3 | 0.01            | -1.26                 | 1.28        |                          | ns       |
| 24 h |                                                      | Ct vs BG1  | 6.22            | 4.96                  | 7.49        | 0.48                     | <0.0001  |
|      |                                                      | Ct vs BG2  | 6.16            | 4.89                  | 7.42        |                          | <0.0001  |
|      |                                                      | Ct vs BG3  | 3.98            | 2.71                  | 5.24        |                          | <0.0001  |
|      |                                                      | BG1 vs BG2 | -0.07           | -1.34                 | 1.20        |                          | ns       |
|      |                                                      | BG1 vs BG3 | -2.25           | -3.52                 | -0.98       |                          | p=0.0002 |
|      |                                                      | BG2 vs BG3 | -2.18           | -3.45                 | -0.91       |                          | p=0.0002 |
| 48 h |                                                      | Ct vs BG1  | 5.78            | 4.51                  | 7.04        | 0.48                     | <0.0001  |
|      |                                                      | Ct vs BG2  | 8.64            | 7.37                  | 9.91        |                          | <0.0001  |
|      |                                                      | Ct vs BG3  | 7.56            | 6.29                  | 8.83        |                          | <0.0001  |
|      |                                                      | BG1 vs BG2 | 2.87            | 1.60                  | 4.14        |                          | <0.0001  |
|      |                                                      | BG1 vs BG3 | 1.78            | 0.52                  | 3.05        |                          | p=0.0021 |
|      |                                                      | BG2 vs BG3 | -1.08           | -2.35                 | 0.18        |                          | ns       |
